# Supplementary material
Source: PubMed Central journal article supplement (PMC1568942)

**A**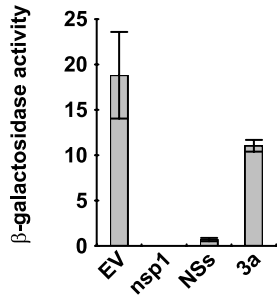**B**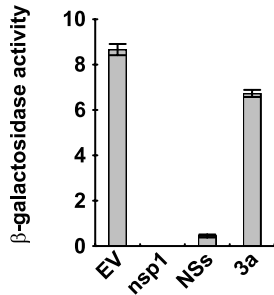**C**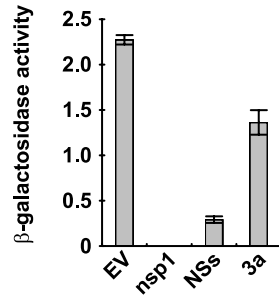**D**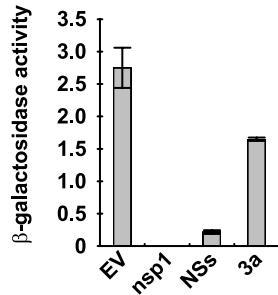**E**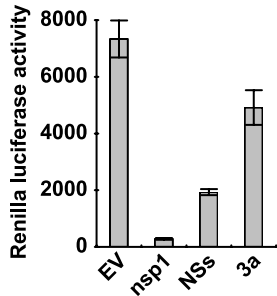**F**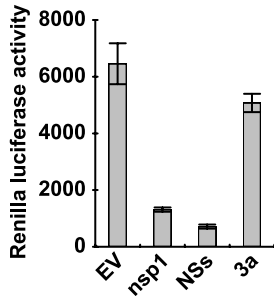**G**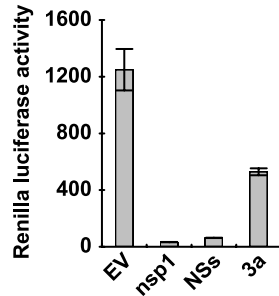**H**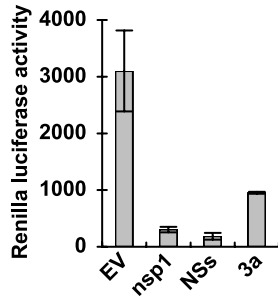

Supplement: pnas_0603144103_2.pdf [file pnas_0603144103_2.pdf]

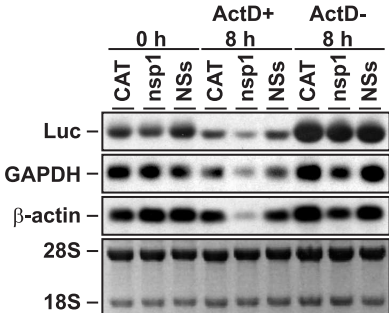

Supplement: pnas_0603144103_4.pdf [file pnas_0603144103_4.pdf]
